# Supplementary material
Source: publisher figshare collection journal article supplement (https://sage.figshare.com/ndownloader/files/18057734)
Supplement: Supplementary file 1 [file 18057734]

**Supplementary Information**

1. Appendix 1: Korean materials (glossed)
2. Appendix 2: English materials
3. Tables S1, S2, S3: Correct vs incorrect mean RTs, Ex 1, Ex 2a, Ex 2b
4. Pairwise contrasts for semantic and phonological target types, Ex 2
5. Table S4a: Condition x target type x quartile means, Ex 2
6. Table S4b: Condition x quartile means, Ex 1

## Appendix 1: Korean language stimuli

*Experimental sentences and semantically related words in focus inducing question sentences in parentheses (note: bold indicates target words)*

다정한 이웃(친구)을 만드는 중요한 요인은 믿음(나눔)이야.

What helps to create friendly **neighbors** (friends) is **trust** (sharing).

그녀가 선물(편지)을 받고도 모른 척 한 것은 작년(재작년)이야.

What she pretended not to know even after receiving a **present** (letter) was the **last year** (year before last).

아랫집 언니(오빠)가 어제 저녁으로 먹고 싶었던 것은 고기(조개)였어.

What the older **sister** (brother) downstairs wanted to have for dinner yesterday was **meat** (clam).

지난해부터 논쟁(협상)의 중심이 된 것은 헌법(복지)이야.

What has been the center of a **dispute** (negotiation) is the **constitution** (welfare).

요즘 젊은이(노인)들이 관심을 두고 있는 것은 직업(결혼)이야.

What **the young** (the elderly) are interested in these days are **jobs** (marriage).

아름다운 섬(산)이 소개되어 인기를 끈 것은 잡지(신문)였어.

What gains popularity after introducing an **island** (mountain) is the **magazine** (newspaper).

조화로운 장식(치장)을 위해 중국에서 들여온 것은 종이(도자기)였어.

What was brought from China for the harmonious **decoration** (adornment) was the **paper** (pottery).

소심한 군인(의사)이 오래도록 취미로 둔 것은 요리(공예)였어.

What the timid **soldier** (doctor) has had as a hobby for a long time is **cooking** (crafts).

어제 봤던 남녀(형제)가 함께 배웠던 것은 춤(노래)이었어.

What the **man and woman (sibling)** whom (subject) saw yesterday learnt together was a **dance (song)**.

연로한 스님(수녀)이 매번 바라본 것은 달(별)이었어.

What the old **monk (nun)** always looks at is the **moon (star)**.

전시회의 관객(담당자)으로 정체를 숨긴 것은 위원장(총장)이었어.

Who was concealing an identity as an **audience member (manager)** was a **chairperson (president)**.

주민들이 공장(농장)에 항의를 한 것은 냄새(연기)야.

What local residents complained to a **factory (farm)** about was the **smell (smoke)**.

이번 훈련(사고)을 문제 없이 성사시킨 것은 사장(차장)이야.

What contrived the **training (accident)** without trouble was the **president (deputy head of department)**.

오른쪽 주머니(손)에서 발견된 것은 잎(동전)이었어.

What was found in the right **pocket (hand)** was a **leaf (coin)**.

지붕 위에 새(고양이)가 다쳤던 것은 다리(날개)였어.

What the **bird (cat)** hurt on a roof was its **leg (wing)**.

길거리에서 판매(도박)를 하다 잡혀간 것은 농민(어부)이었어.

[The people] who were caught **selling (gambling)** on the street were the **farmers (fishermen)**.

이번 실험(과제)에서 우리가 관심을 두는 것은 식물(동물)이야.

What we are interested in in this **study (assignment)** is **plants (animals)**.

중년의 검사(변호사)에게 평온을 주는 것은 신앙(가족)이었어.

What gave a middle-aged **prosecutor (lawyer)** peace was his **faith (family)**.

지저분한 바닥(천장)에서 발견된 것은 증권(통장)이었어.

What was found on the dirty **floor (ceiling)** were **securities (bankbook)**.

시내의 백화점(시장)에서 어렵게 구매한 것은 칼(꽃)이야.

What (subject) bought from a downtown **department store** (market) with difficulty was a **knife** (flower).

수년 간 그의 **생존(재력)**을 좌지우지하게 만든 것은 **심장(콩팥)**이었어.

What controlled his **living** (wealth) for several years was his **heart** (kidney).

오래된 **벽(바닥)**에 그림을 그려 넣은 것은 **자랑(잘못)**이야.

The drawings on an old **wall** (floor) were **boasts** (faults).

드넓은 **숲(바다)**에서 오래도록 우리가 바라본 것은 **별(달)**이야.

What I watched for a long time at a vast **forest** (sea) was/were the **stars** (moon).

억울해하던 **청년(노인)**이 지키고자 했던 것은 **약속(재산)**이야.

What the angry **young man** (old man) tried to keep was the **promise** (property).

그 협회의 **회장(간사)**이 꿈꾸는 것은 **농사(사업)**야.

What the **president** (assistant administrator) at an association aims for is **farming** (business).

발표를 앞둔 **학자(비서)**의 긴장을 풀어준 것은 **음악(응원)**이었어.

What relieved the tension of the **scholar** (secretary) who was going to present was **music** (cheering).

배탈이 난 **딸(아들)**이 지금 먹고 싶어하는 것은 **밥(빵)**이야.

What the **daughter** (son) who had an upset stomach wants to eat now is **rice** (bread).

하나뿐인 **자식(조카)**이 상속받게 되는 것은 **가게(주택)**였어.

What the only **offspring** (cousin) will inherit is a **store** (house).

계속 울던 **아기(엄마)**를 웃게 만들어준 것은 **꽃(별)**이었어.

What made a crying **baby** (mother) smile was a **flower** (star).

여전히 **고향(국가)**을 대표하는 것은 **음식(경관)**이야.

What still represents a **hometown** (country) is the **food** (landscape).

몸이 아픈 **형(동생)**이 듣기 싫어한 것은 **노래(잔소리)**였어.

What the sick older brother (younger brother) hated to listen to were songs (nagging).

내후년 봄(여름)에 내가 그리고 싶은 것은 풍경(인물)이야.

What I want to draw in spring (summer) in the year after next are landscape (people).

정부가 경쟁력(군사력)을 갖추기 위해 재정비 한 것은 산업(농업)이야.

What a government reorganizes to have competitiveness (military power) is the industry (agriculture).

다같이 작업(타협)을 하기가 어려운 것은 숫자(그림)였어.

What was difficult to work (to compromise) together on was the number (drawing).

그 사람이 운명(범인)이라고 느끼게 해준 것은 눈빛(얼굴)이었어.

What helped people find out that the guy would be the fate (suspect) was a look (face).

출장을 간 남편(부인)에게서 마지막 전화가 온 것은 밤(낮)이야.

When a phone call came from the husband (wife) on a business trip it was during the night (daytime).

유일하게 이해(전달)가 잘 안됐던 것은 과학(수학)이야.

What we failed to understand (to deliver) well was only science (mathematics).

얕은 이론(지식)으로 설명할 수 없는 것은 철학(문학)이야.

What cannot be explained with shallow theory (knowledge) is philosophy (literature).

성급한 판단(행동)을 이끈 것은 분위기(강압)였어.

What led to the hasty decision (behavior) was the mood (pressure).

우리 팀의 동료(선배)가 그에게 부탁했던 것은 번역(발표)이었어.

What a **colleague (senior)** of our team asked him to do was a **translation (presentation)**.

정규직 **전환(계약)**이 성사됐지만 여전히 우려되는 것은 **대출(적금)**이야.

What is still concerning in spite of a **change (contract)** to a permanent position are **loans (savings)**.

어린이 **보호(기분)**를 위해 그들이 바꾼 것은 **색깔(모양)**이야.

What has been altered for the **protection (feelings)** of children is the **color (shape)**.

역사적인 **확인(고찰)**을 한 후 문서화 해야 하는 것은 **전쟁(통일)**이야.

What should be documented after historical **verification (consideration)** is a **war (unification)**.

그들이 **고개(골목)**를 지나서 찾은 것은 **은행(약국)**이야.

What they found after passing by the **hill (byway)** was a **bank (pharmacy)**.

이런 상황에서 **고민(안심)**이 되는 것은 **졸업(입학)**이야.

What gave **worry (relief)** in this situation was the **graduation (entrance into a school)**.

그녀에게 **상처(희망)**를 준 것은 **차별(가난)**이었어.

What gave her **pain (hope)** was **discrimination (poverty)**.

갑작스런 **태도(표정)**의 변화를 가져다 준 것은 **권력(금전)**이었어.

What caused a sudden change in **attitude (expression)** was **authority (money)**.

마찬가지로 **선진국(후진국)**에서 공개를 꺼려하는 것은 **수익(정책)**이야.

What an **advanced country (developing country)** does not want to open is **revenue (policy)**.

그가 **불법(실수)**을 저질러서 해외로 도피했다는 것은 **소문(사실)**이었어.

What he escaped because of a/an **illegality (mistake)** was a **rumor (fact)**.

내년에 **예산(저축)**을 대폭 줄여서라도 사들이고 싶은 것은 **가구(시계)**야.

What (subject) wants to buy even if (subject) has to reduce **budget** (savings) in the next year is **furniture** (watch).

할아버지가 **감동(충격)**을 받아 흐느끼신 것은 **연출(사실)**이었어.

What a grandfather sobbed due to **impression** (shock) was **fake** (fact).

그가 어제 **실수(고의)**로 가져오지 않은 것은 **시계(반지)**였어.

What he didn' t bring by **mistake** (purpose) yesterday was his **watch** (ring).

어린 학생이 **비밀(폭로)**로 하고 싶어했던 것은 **가난(성적)**이었어.

What the young student wanted to keep **secret** (disclose) was his **poverty** (grade).

지난해 **아저씨(아주머니)**가 배웠던 것은 **경영(행정)**이야.

What the **middle-aged man** (middle-aged woman) learned in the last year was **business** (administration).

부동산 **계약(매매)**이 잘못된 관계로 피해를 본 것은 **재벌(서민)**이었어.

[The people] who had been hurt by a real estate **contrast** (trading) were **rich people** (ordinary people).

친구의 **누나(오빠)**가 내일 빌려 달라고 한 것은 **그릇(컵)**이야.

What the **older sister** (older brother) asks to borrow tomorrow is a **bowl** (cup).

재판에서 **증거(증인)**로 채택된 것은 **책상(연필)**이었어.

What has been taken as **evidence** (witness) is a **desk** (pencil).

우리 반 **반장(부반장)**이 지난 여름 방학에 다녀온 곳은 **시골(섬)**이었어.

Where our **class president** (class vice president) visited last summer was the **rural area** (island).

식사를 하던 **의사(간호사)**가 지저분하다고 생각한 것은 **창문(책상)**이었어.

What the **doctor** (nurse) who was having a meal thought was dirty was the **window** (desk).

어제 마주친 **소녀(소년)**가 손에 들고 있던 것은 **사전(거울)**이었어.

What the **girl (boy)** whom (subject) met yesterday held in their hands was a **dictionary (mirror)**.

청소하던 주부(아가씨)가 뒤를 돌아 바라본 것은 침대(의자)였어.

What the cleaning **housewife (young lady)** was looking back at was a **bed (chair)**.

요구한 비용(서류)에 의문을 제시한 것은 공무원(언론인)이었어.

[The person] who raised a question about the requested **cost (document)** was a **public servant (journalist)**.

시커먼 연기(불기둥)가 치솟아 한동안 폐쇄된 것은 골목(시장)이야.

What was closed for quite a time due to **smoke (a pillar of fire)** was an **alley (market)**.

친절했던 시인(화가)을 다시 만났던 것은 겨울(가을)이었어.

[The time] when (subject) met the kind **poet (painter)** again was **winter (autumn)**.

힘들어하시던 아빠(엄마)에게 위로가 된 것은 소득(건강)이었어.

What comforted a **dad (mom)** who had a hard time was **income (health)**.

생물학 박사(석사)가 관심을 두지 않은 것은 재산(업적)이었어.

What a **doctor (master)** in biology did not care about was **property (achievement)**.

내가 동생(언니)에게 빨리 하라고 시킨 것은 과제(청소)였어.

What I asked **my younger sister (older sister)** to be quick about was an **assignment (cleaning)**.

그들이 검토(관리) 중이라고 말한 것은 공연(여행)이야.

What they said they were under **investigation (management)** about was the **performance (travel)**.

건강했던 무릎(팔)을 다쳐서 할 수 없었던 것은 관광(운동)이야.



What (subject) cannot do because their healthy **knee (arm)** got hurt was **sightseeing (exercise)**.

갑자기 **차량(기계)**이 고장 나는 바람에 취소된 것은 **행사(야유회)**야.

What has been cancelled because the **vehicle (machine)** has broken down was the **event (picnic)**.

방학에 **목표(소일)**로 삼은 것은 **봉사(공부)**였어.

What was set as a **goal (pastime)** was **service (study)**.

지난해 **축제(강의)**를 취소한 것은 **총장(학생회)**이었어.

[The person] who cancelled the last **festival (lecture)** was a **president (student council)**.

옆집 사는 **처녀(청년)**가 새롭게 해보고 싶은 것은 **농업(창업)**이야.

What the **young lady (young man)** next door wants to try is **agriculture (business start-up)**.

주먹만한 **구멍(샘)**이 뚫려서 사람들의 이목을 받는 것은 **바위(섬)**야.

What attracts attention due to the fist-size **hole (spring)** is the **rock (island)**.

유통환경이 **개선(보존)**되어야 한다고 요구한 것은 **소비자(판매자)**였어.

[The people] who requested **improvement (preservation)** in distribution environment were the consumers (**sellers**).

유학을 간 **오빠(언니)**가 새롭게 관심을 두는 것은 **세포(척수)**야.

What the **older brother (older sister)** is newly interested in are **cells (spinal cord)**.

일관된 **기준(침묵)**으로 호평을 받는 것은 **검찰(언론)**이야.

What has a favorable notice due to consistent **standard (silence)** is the **prosecution (press)**.

엣그제 **교사(선배)**가 준비물로 내준 것은 **사진(그림)**이었어.

What a **teacher (senior)** asked to prepare a couple of days ago was a **photo (painting)**.

손쉽게 **비교(제거)**의 대상이 된 것은 **병원(약국)**이었어.

What became a target of **comparison (elimination)** was the **hospital (pharmacy)**.

일요일 **오후(아침)**에 전화를 건 것은 **주인(세입자)**이었어.

[The person] who made a phone call in Sunday **afternoon (morning)** was the house **owner (tenant)**.

세대의 **차이(오해)**를 극복할 수 있도록 도와준 것은 **대화(교육)**였어.

What helped in overcoming the generation **gap (misunderstanding)** was **conversation (education)**.

불합리한 **노동(경영)**이 세상에 알려지도록 도운 것은 **보도(고백)**이었어.

What helped to let people know about illogical **labor (management)** was **media coverage (coN ession)**.

사람들의 기억(**소문**)보다 오래 남을 수 있는 것은 **기록(소문)**이야.

What can last longer than people' s **memories (rumors)** is a **record (rumor)**.

건강해진 **아내(어머니)**가 요즘 집중하고 있는 것은 **사업(살림)**이야.

What the **wife (mother)** who regained health focuses on these days is **business (housekeeping)**.

수출이 **유지(증가)**될 수 있도록 도와준 것은 **광고(환율)**야.

What helps the **maintenance (increase)** of an export are **advertisements (exchange rates)**.

진압에 **반대(찬성)**를 한다고 입장을 표명한 것은 **경찰(검찰)**이야.

What expresses **opposition (support)** to suppression is **police (prosecution)**.

여기 있던 **환자(의사)**가 마지막까지 원했던 것은 **행복(여행)**이었어.

What the **patient (doctor)** here wanted at the end was **happiness (trip)**.

요새 **방송(신문)**에서 다루는 것은 **통일(과학)**이야.

What the **broadcast (newspaper)** covers these days is **reunification (science)**.

내가 청소년(어른)들에게 장려하고 싶은 것은 체험(이론)이야.

What I want to encourage teenagers (adults) to achieve is experience (theory).

예고 없이 규제(검문)가 강화될 때 예상되는 것은 저항(단합)이야.

What could be expected to happen when regulations (inspections) get tightened is resistance (unity).

누출된 보고서(기술)로 문제가 된 것은 외교(경제)였어.

What became a problem due to reports (technology) leaking was the diplomacy (economy).

고통을 예술(사랑)로 승화시키기 위해 포기한 것은 시선(관심)이야.

What was given up to sublimate pain into art (love) was people' s gaze (attention).

아직도 평균(중간값)만큼 필수적인 정보를 담고 있는 것은 비율(중간값)이야.

What contains information as essential as a mean (median) is the ratio (median).

그 소설 작가(편집자)가 혹평을 받은 것은 구성(제목)이야.

What is subject to criticism for the novel writer (editor) is the composition (title).

외투를 식당(집)에 두고 서둘러 나온 것은 조작(실수)이었어.

Leaving in a hurry without an overcoat at a restaurant (home) is a fabrication (mistake).

그녀의 선배(후배)가 요즘 관심을 두는 것은 논문(결혼)이었어.

What her senior (junior) is recently interested in is a thesis (marriage).

지난번에 승리(기회)를 놓치게 만든 것은 수술(여행)이었어.

What led to missing a victory (opportunity) was a surgery (trip).

오랫동안 목숨(명예)을 걸고 지키려 했던 것은 신용(명예)이었어.

What (subject) tried to protect upon a **life (honor)** for a long time was a **credit (honor)**.

오래된 **교실(거실)**에서 지금 바뀌야 하는 것은 **의자(책상)**야.

What should be changed from the old **classroom (living room)** is the **chair (desk)**.

지난달 **세금(관리비)**을 제때 내지 않은 것은 **불만(계획)**이었어.

Not paying **taxes (maintenance cost)** in time last month was the **complaint (plan)**.

어두운 **부엌(안방)**에서 나를 놀래 킨 것은 **벌레(박쥐)**였어.

What surprised me in a dark **kitchen (main room)** was a **bug (bat)**.

학생들에게 **학습(교육)**이 잘 되지 않았던 분야는 **화학(수학)**이었어.

What students had **learning (education)** difficulties with was **chemistry (mathematics)**.

취업을 한 **형제(자매)**가 어머니를 위해 준비한 것은 **가방(여행)**이었어.

What the **brothers (sisters)** who got jobs prepared for their mother was a **bag (trip)**.

언론에서 **모순(음모)**이 있다고 지적한 것은 **판결(법)**이야.

What the media points out as a **contradiction (conspiracy)** is the **ruling (law)**.

물망에 오른 **배우(가수)**가 마음에 들어 한 것은 **제목(대본)**이었어.

What the **actor (singer)** who was a strong candidate liked was a **title (script)**.

부모님이 **장사(운동)**를 마치고 찾으시는 것은 **맥주(소주)**야.

What parents want to have after finishing a **business store (exercise)** is **beer (soju)**.

그들이 **근거(문제)**로 제시한 것은 **수입(부동산)**이었어.

What they provided as the **basis (problem)** was **income (real estate)**.

스스로 위기(슬픔)를 이겨낸 그에게 필요한 것은 여행(휴식)이야.

What he needed after overcoming a **crisis (grief)** by himself was a **trip (rest)**.

이번에 기계(벽지)를 구입하는 데 걸림돌이 된 것은 가격(품질)이야.

What was an obstacle to buying a **machine (wallpaper)** this time was **price (quality)**.

더울 때 어른(어린이)들이 원하는 것은 웃음(수박)이야.

What **adults (children)** want when it is hot is/are **laughs (watermelon)**.

그녀의 편지(선물)가 나에게 배달된 것은 옛날(최근)이었어.

[The time] when I received her **letter (present)** was **long ago (recently)**.

조그만 교회(절)에서 야외 활동을 한 것은 부부(형제)였어.

[The people] who did outdoor activities at a small **church (temple)** were a **married couple (brothers)**.

지난밤 사고(행사)와 관련이 있다고 보이는 것은 어둠(과속)이야.

What seems to be related to the **accident (event)** last night was **darkness (speeding)**.

사측의 요청(강요)으로 구입을 서둘렀던 것은 주택(공장)이야.

What was purchased in hurry because of the **request (pressure)** from the company was a **house (factory)**.

그가 투표(결정)를 해야 한다고 발언한 것은 거래(진심)였어.

What he commended that a **vote (decision)** was needed on was/were the **transactions (truth)**.

아무런 감각(의식)이 없어지고 어지러워진 것은 핵심(연출)이었어.

What the (subject) lost sense (consciousness) of and felt dizzy was the **core (direction)**.

다니던 직장(학교)을 관두고 창업을 한 것은 도전(계획)이었어.

What (subject) attempted to establish a business after leaving a job (school) was the **challenge** (plan).

홀로된 노인(청년)이 차지하고 싶었던 것은 건물(땅)이었어.

What the **old man** (young man) who was alone wanted to take was a **building** (land).

7년 전 나무(감자)를 심은 것은 투자(사치)였어.

Planting a **tree** (potato) 7 years ago was an **investment** (luxury).

중요한 조건(발견)으로 내가 내놓은 것은 성격(직업)이야.

What I asked as an important **requirement** (discovery) was a **personality** (job).

신속하게 처리(배달)를 하기 어려운 것은 쌀(물)이야.

What is difficult to deal with (delivery) is **rice** (water).

어렵게 인정(거짓)을 하고 난 후 보인 것은 눈물(분노)이었어.

What (subject) showed after **admitting** [to] (lying [about]) with difficulty was/were **tears** (anger).

아무튼 결혼(약혼)이 성사되기 위해서 필요한 것은 노력(양보)이야.

What is essential for a **marriage** (engagement) to be accomplished is **effort** (concession).

대다수의 신문(방송)에서 앞다투어 다룬 것은 선거(경제)야.

What most **newspapers** (media) competitively deal with is the **election** (economy).

그 사람의 사망(질병)을 초래한 것은 술(담배)이야.

What brought the person' s **death** (disease) was the **alcohol** (tobacco).

새로운 제품(인력)을 개발하기 위해 그가 판 것은 땅(건물)이었어.

What he sells to develop a new **product** (human resources) is the **land** (building).

이 중에서 모양(색깔)이 특이해 보이는 것은 물결(파도)이야.

What the **shape** (color) among many that looks special are the **waves** (waves).

소파에 앉아 아침(저녁)부터 집중하여 쓴 것은 시(수필)였어.

What (subject) was intensively writing from morning (night) on a sofa was a poem (essay).

어려워도 원칙(약속)을 지키기 위해 시작한 것이 개혁(협상)이야.

What (subject) began to keep the principle (promise) even if it is tough is the reformation (negotiation).

국문과 교수(조교)가 그에게 사과를 한 것은 발전(난제)이야.

What a professor (assistant) in department of Korean language apologized to him about was a progress (dilemma).

지인들과의 모임(활동)에서 불매운동을 벌이는 것은 옷(약)이야.

What (subject) with colleagues at the meeting (club) are boycotting is clothes (medicine).

아이가 배(기차)를 타는 동안 하염없이 바라본 것은 하늘(파도)이야.

What a child was blankly watching on a boat (train) was the sky (wave).

그렇지만 상대방(스스로)에게 강요하지 말아야 하는 것은 희생(판단)이야.

What we should not force a counterpart (ourselves) are sacrifices (decisions).

단기간에 회복(성장)이 가능할 것 같은 것은 무역(환율)이야.

What could show recovery (growth) in a short period of time is the trade (exchange rate).

빠르게 수요(공급)가 증가한 것은 담배(술)야.

What showed a fast increase in demand (supply) was the tobacco (alcohol).

엄격한 평가(통제)를 받기 위해 그들이 선택한 것은 침묵(항의)이었어.

What they picked for a strict evaluation (control) was silence (complaint).

즉각적인 효과(변화)를 추구하면서 놓치게 된 것은 도덕(질서)이야.

What was missed because of the immediate effect (change) was morality (order).

많은 이들이 **신화(역사)**로 남을 만하고 칭송한 것은 **규모(역사)**였어.

What many people say could be **myth (history)** is a **scale (history)**.

두꺼운 **줄(종이)**로 당겨서 꺼낸 것은 **쓰레기(상자)**였어.

What was taken out using a thick **string (paper)** was **trash (box)**.

주저했던 **대답(마음)**을 전할 수단으로 선택한 것은 **글(말)**이야.

What is chosen to tell an **answer (mind)** is via **writing (speaking)**.

### *Control sentences*

요즘 들어 **불안**한지 사람들을 지나치게 적대시하는 **경향**이야.

It seems (subject) showed a **tendency** to be hostile to others too much maybe due to **anxiety**.

항상 **버스**를 타고 다람쥐 쳇바퀴 돌 듯 지낸 **일상**이야.

It is **daily life**, going around in circles by **bus** every day.

기다리기가 **부담**되고 지루해서 잠시 다른 장소로 **이동**했었어.

It was a **burden** and boring to wait so (subject) **moved** to another place.

이 커다란 **마당**의 저장물은 모두 그의 **소유**야.

This huge **yard** is his entire **possession**.

이번 **전망**이 굉장히 좋게 나옴에 따라 기대가 **상승**했어.

The expectation shows an **upswing** due to an excellent **prospect**.

눈부시게 **태양**이 빛나는 5월 말의 **낮**이었어.

It was a **day** at the end of May when the **sun** was brightly shining.

안타깝게도 **평소** 등산객들의 잦은 내왕으로 **오염**됐어.

Unfortunately, it is **polluted** due to **everyday** mountain hikers' frequent visits.

수십개의 **영역**임에도 불구하고 우리 상품이 안전 심사에 **통과**했어.

Our product **passed** the safety examination which contains dozens of **domains**.

그런 **측면**에서 부분적이거나 우리 둘은 **일치**해.

You and I partially achieved an **agreement** in that **respect**.

그는 **관계자**에게 지나가는 말로 가볍게 **한마디** 했었어.



He said a **word** in passing to the **person interested**.

그는 **치료**를 위해 녹음된 소리를 듣고 따라 말하기를 **반복**했어.

He did a **repetition** of listening and speaking the recorded sounds for **treatment**.

여러 차례 **합의**를 본 결과 이번 세미나 장소는 부산으로 **확정**됐어.

The place for a seminar was **fixed** to Busan after several **mutual consents**.

이모는 **억압**적으로 나에게 저녁을 지으라고 **명령**했어.

Aunt **ordered** me to prepare dinner with **repression**.

대학의 **입학** 정원이 매해마다 조금씩 줄어드는 **추세**야.

It is a **tendency** for numbers of an **entrance** quota to decrease little by little.

밀봉한 **식품**은 공기의 침입이 차단되어서 부패가 **방지**돼.

The sealed **food** can be **protected** from spoilage because air cannot pass through.

속보에 따르면 **오전**에 지진이 크게 나서 많은 것이 **파괴**됐대.

According to breaking news, many things were **destroyed** due to an earthquake in the **morning**.

다시 한번 **고객**의 입장을 듣고 나니 어렴풋하게나마 내 잘못이 **짐작**됐어.

My fault was vaguely **inferred** after listening to the **customer's** position.

이번에는 **나름** 학생들의 입맛을 많이 **반영**했어.

This time, **somewhat** students' tastes were **reflected** a lot.

이번 **경기**에서 우리 팀은 3 팀을 모두 연파하고 결승에 **진출**했어.

In this **match**, our team beat 3 other teams in a row and **reached** to the finals.

화가 난 **교장**을 회유하기 위해 갖가지 방법이 **동원**됐어.

Several ways were mobilized for **conciliating** the angry **principal**.

*Filler sentences*

다양한 약재와 천연 허브가 골고루 들어있는 것처럼 보였다.

It looks as though they contained various medicines and natural herbs.

예로부터 알려진 과실주와 곡물주를 생산했다.

The fruit wine and grain wine famous from old times are produced.

제철 감자를 수확하느라 일손이 부족했다고 한다.

They were harvesting seasonal potatoes so there was a shortage of workers.

정치적 책임을 지고 고독하게 나라를 떠날 준비를 했다.

(Subject) has prepared to leave lonely due to political responsibility.

상업적 가치가 높고 희귀한 버섯을 최초로 구매하였다.

The mushrooms which have high commercial values and are unique have been purchased first.

야외 수영장에서 샤워실과 탈의실을 무료로 제공한다.

A shower room and dressing room at the outdoor pool are open for free.

이번 통계에 따르면 고궁 관람객의 발길이 뜸해진 것으로 나타났다.

According to this statistic, people have rarely visited an old palace.

도로를 재정비하고 표지판을 추가로 설치할 예정이다.

A road sign will be set up after a road improvement.

책가방을 열어보니 참고서가 가득 들어 있었다.

There were many reference books in an open backpack.

신인 가수가 긴장해서 무대로 나오다가 비틀거렸다.

The new singer was nervous so the singer staggered.

그는 옷걸이에서 교복을 꺼내 입고 등교했다.

He took a school uniform from a hanger and went to school.

그날 나는 추위와 공포 때문에 정신이 혼미해 졌었다.

I became delirious that day due to the cold and fear.

점잖게 비서의 안내를 받으며 옆자리에 앉았다.

(Subject) took the next seat, escorted by a secretary.

우리집 강아지가 꼬리가 설렁거리며 따라왔다.

Our dog followed with its tail wagging.

연하게 화장을 하고 외출을 했다가 금방 돌아왔다.

(Subject) put on light makeup and came back soon.

삼촌이 혼자서 떨어진 장판을 걷어내고 새 장판을 깔았다.

Uncle removed old floor paper and then laid new floor paper.

크고 작은 수십 개의 냄비들이 크기대로 정돈되어 있었다.

Dozens of big and small pots were in place.

길을 걷다가 아무런 보석이 달리지 않은 반지를 주웠다.

(Subject) picked up a ring without any jewels when walking along the street.

우리들은 갯벌에 나가 큰 조개들을 주우면서 시간을 보냈다.

We spent time picking big shellfish at a mud flat.

손발을 깨끗이 씻어서 감기에 잘 걸리지 않은 것 같다.

It seems that washing hands and feet helped prevent a cold.

아직 가을이지만 날씨가 추워서 솜이불을 꺼냈다.

A cotton-stuffed blanket was taken out although it is not autumn yet.

공사장에서 노동자들에게 안전모를 착용하도록 지시하였다.

In the construction site, workers were asked to put on a safety helmet.

멀리 해외에 나가 있는 사람들이 이용하기에 좋다.

It is good for people living abroad to use it.

어제는 학원에서 수업이 늦게 끝나는 바람에 피곤했다.

Yesterday was tiring because the class at the private school finished late.

박물관에 견학을 가기로 했는데 차비가 없었다.

(Subject) planned to visit a museum but did not have the transportation fare.

가죽 필통을 주문하려고 인터넷에서 디자인을 찾아봤다.

(Subject) searched the design on the internet to order a leather pencil case.

그는 열쇠를 찾으려고 온갖 서랍을 열어 보았다.

He opened a drawer to find a key.

태풍으로 가로수가 쓰러져서 행인들에게 불편을 주었다.

The street trees felled by the typhoon caused inconvenience to pedestrians.

그가 소포로 여러 종류의 차를 보내줘서 고마웠다.

I appreciated him sending several kinds of tea.

기차로 거의 한나절을 가는 거리에 살고 있다.

It takes about half a day by a train to get where I live.

공기가 잘 통하지 않는 방으로 배정이 되어서 화가 났다.

(Subject) gets angry because the assigned room has bad ventilation.

응답자의 절반 이상이 상당한 지출을 감수했다.

More than half of the respondents endured substantial expenses.

아무래도 커다란 비난이 쏟아질 것 같은 예감이 들었다.

There was foreboding that substantial criticism will be raised.

충분한 안정을 취하면서 꼼꼼히 이것 저것 따져보았다.

Taking enough rest, (subject) has carefully checked several points.

우리들 나이가 비슷해서 말을 놓고 지내기로 했다.

We decide to talk in a casual way as we are of a similar age.

공직 생활을 떠날 수 있을 것 같다고 엄포하였다.

(Subject) threatens that (subject) could leave a public career.

지난 초복에 영양식으로 삼계탕을 맛있게 먹었었다.

(Subject) had chicken soup as nourishing food last Chobok.

농산물 시장에서 배추와 양파를 사서 들어왔다.

(Subject) brings the cabbage and onion at a farmers market.

국회의원으로 선출된 그는 거처를 옮기기로 결정했다.

The man who is elected the National Assembly has decided to move.

올 하반기 다채로운 색채의 구두가 선보일 예정이다.

In the second half of the year, shoes with various colors will be introduced.

우리 닭이 달걀을 많이 낳지 않지만 건강하다.

Our hens lay only a few eggs but are healthy.

우표가 붙여져 있지 않았기 때문에 벌금을 물었다.

(Subject) paid a fine because there was no stamp.

소송을 내려고 변호사와 함께 준비하다가 포기했다.

(Subject) had prepared a lawsuit with a lawyer but gave it up.

이런 저런 까닭에 시댁과 사이가 멀어졌다.

(Subject) has grown apart from her husband's family for several reasons.

## Appendix 2: English language stimuli

*Experimental sentences (note: bold indicates target words)*

There was this **painting** in the **kitchen** that impressed the guests.

There was this **picture** that the little **girl** wanted to get at the fair.

There is this **tomato** that's been rotting in the **fridge** all week.

There was this **battle** between the **armies** that lasted several days.

There was this **file** open on the **desk** in the workplace.

It was a **prize** that would be awarded to the **winner** of the race.

It was the **cat** who ruined the **rug** in the new hallway.

It was the **pub** that sustained the most **damage** from the hail.

It was the **singer** who attracted the large **queue** to the nightclub.

It was the **dog** who sat in the **sun** on the patio.

There was this **medal** displayed on the **stand** in the living room.

It's the **workers** who need good **transport** when it's time to go home.

There was this **crate** that had to be carried up two flights of **stairs** to the agency.

There was this **temple** that covered two square **blocks** of the town.

There was this **thief** who surprised the **police** with his shrewd strategy.

It was the **manager** who played **golf** instead of going to work.

It was a **cap** that had fallen off his **head** and blown away.

It was the **moon** that provided **protection** from the meteorite.

It was the **weekend** that would be ruined if the **weather** turned very bad.

It was the **gas** that had been the cause of an **explosion** in the old building.

It was the **noise** that was keeping the **kids** awake at night.

It was the **taxes** that angered the people of the **city** every year.

This is the **road** that the **family** lived on.

There was this **writer** who had tracked down a very dangerous **animal** in the wild.

It's from **wood** that the best **toys** are made from.

It was the **woman** who loved the **house** the most.

There is this **boy** who plays in the **shop** before school.

It was **bones** that were found by the **archaeologist** in a cave.

There was this **poster** that showed where all the **parks** could be found.

It was the man's **shirt** that stood out in the **crowd** that day.

There was this **driver** who slowed the **traffic** at the intersection.

It was the **artist** who received the special **award** at the ceremony.

It's on **Monday** that the **project** is due.

It's **teenagers** who like to **sleep** the most.

There was this **plan** to sail the **boat** east.

It was the **missile** that frightened the **residents** of the small town.

There was this **session** that was held to prepare **researchers** for the new job.

There was this **valley** that has a **river** that stretched to the coast.

There was this **charcoal** in the **grill** that just didn't burn fast enough.

There was this **train** that would take the **colleagues** across the country.

It was a **ring** that had fallen on the **floor** behind the dresser.

There was this **street** nearby that the **father** really worried about.

There was **egg** on the **ground** that made her slip.

There were these **shoes** in the **window** that were on display.

It was the **tea** that kept the **secretary** awake all night.

There was this **author** who had shocked the **miners** with her article.

There was this **statue** at the site that served as a **monument** to the war.

There's this **bread** from the **store** that tastes really good with cheese.

It was the **garage** that protected the **bikes** during the blizzard.

There is this **waterfall** that looks **blue** in the morning.

It was the **lion** that really stole the **show** at the circus this year.

There was this **taxi** that ran the red **light** and caused a terrible accident.

It was the **plants** that provided a burst of **colour** in the dull room.

It was a **suit** that was first on the **list** of new things to buy.

There was this **rat** on the **path** that was fascinating to watch.

It was the **judge** who stole **documents** from the case.

It was the **note** that had angered many of the **employees** at the agency.

It was her **nose** that was **broken** after the accident.

It was the **garbage** that caused the terrible **smell** in the building.

It was a **car** that hit the **person** on the sidewalk.

It was a **customer** who ate **breakfast** in the diner.

There was this **story** circulating in the **office** a day after she quit.

It was the **fight** that caused his **neighbours** to call the cops.

It was the **meeting** that enhanced **relations** between the two countries.

It was the **library** that would get the most **support** from the council.

There was a **joke** told at the **festival** that made everyone laugh.

It was the **matches** that ran in **winter** that needed to be cancelled.

There is a **phone** next to the **seat** if you need to make a call.

It was the **tourist** who took a **photo** of the lake.

There was a **lamb** who ran away from the **flock** and became lost.

It was the **instructor** who blew the **whistle** when the time was up.

There was this **table** that took up too much **space** in the small room.

There was this **lamp** in her room that was a **present** from her parents.

There was this **bird** that had fallen from a **tree** and injured its wing.

There was this **storm** that destroyed all the **roofs** in the community.

It was the **cutlery** that she kept in the **drawer** for special occasions.

It was a **shovel** that was hanging in the **shed** outdoors.

It is **Australia** that has sandy **beaches** all along the coast.

There were these **biscuits** on the **plate** in the dining room.

It was a **pen** that she used to write in her **diary** on Sundays.

There was this **game** on TV in the **afternoon** that lasted three hours.

There are these **boots** which match my **coat** that I want to buy.

There was some **paperwork** that angered the **applicants** during the job induction.

There are special **tools** used by **dentists** when you go for a check-up.

It was playing **tennis** that the **player** sprained her ankle during the match.

There was this **ferry** that took all the **passengers** across to the island

It was a **computer** that calculated the **results** of the students' test.



It was a **loan** to purchase a block of **land** that he applied for.

There was this **cinema** that played scary **movies** every Thursday.

It was the **flood** that washed away the **soil** from the paddock.

There is this **operation** that provided new **hope** for cancer patients.

There is this **gallery** displaying jewellery made from **gold** throughout the season.

There is this **kettle** in the middle of the **counter** you can use for coffee.

It is from **brick** that the **interior** was constructed from.

There is this **fruit** you can mix with **ice** to make a delicious drink.

It was the **rain** that made the **pool** overflow.

It was a **branch** that fell into the **camp** and woke everyone up.

It was the **watcher** on the **balcony** who saw the burglar escape.

It was the **captain** of the **ship** who rescued the sailors.

It was a **restaurant** they visited after the **ballet** recital.

It was a **novel** that was seen as a great **achievement** by the readers.

It was a **lawyer** that he forgot to **pay** and therefore lost his case.

It was the **receipt** for the **trip** that the attendant lost.

It was her **grandmother** who bought the new **carpet** from the sales.

It was **yesterday** that the **rugby** was televised.

There was this **solicitor** who wouldn't accept his **fee** until the case was won.

It was the **milk** she had in the **classroom** that was spilt in the doorway.

There is this **walk** that you need a **map** to find.

There is this **bottle** that hangs **outside** to catch rainwater.

It was a **camera** he purchased as a **gift** for her birthday.

It was the **candidate** who was invited to **dinner** by the minister.

It is to the **south** that the **snow** usually falls.

It is the **tenant** who has extra **keys** to the building.

There was this **sign** advertising the **flat** for sale.

It is the **wages** that are cutting the **profits** of the factory.

It was the **clothes** that made the **dance** so special.

There was this **producer** who was interested in **earthquakes** and wanted to film them in action.

It was his **biography** that was recognised by the **institute** at the function.

There is this **card** that you use to place your **vote** on Election Day.

There was this **magazine** that showcased the **furniture** she intended to buy.

There is this **interview** you need to do in order to study **abroad** in a foreign country.

It was with this **cheque** that the new **equipment** was paid for.

There was this **brochure** that outlined the **cost** of the tour.

There is this **cupboard** that the **certificates** are locked inside for safekeeping.

It is the **volume** that doesn't work on the **amplifier** which causes the distortion.

It was the **lecturer** who showed the **tutor** how to organise the seminar.

There was this **nurse** who calmed the **daughter** after the ordeal.

There was this **baby** whose **face** was loved by everyone.

It was the **railway** that required extra **security** at night.

There is this **statement** that covers concerns about **unemployment** in the area.

It was the **performance** of the **bank** that was measured by the auditors.

It was a **speech** given by the **committee** which was thought provoking.

There is this **market** that sells **food** from the local area.

It was the **newspaper** who featured the **college** in an article.

It was the **sheriff** who made the **arrest** and took the criminal away.

It was the **cleaner** who took the **diamonds** from the safe.

It was the **mayor** who erected a **memorial** in the town square.

There is this **sculpture** that points the way to the **pond** for the visitors.

It is the **gardener** who drives the **tractor** that is kept in the barn.

There was this **treasure** hidden inside **barrels** that were smuggled into the country.

### *Control sentences*

The **presentation** was applauded by the **reviewer** on the debut night.

The **opening** of the **concert** was improved by the director's instructions.

The **creator** of the **design** was honoured to go to the Congressman's party.

The **motion** to dismiss was proposed by the **senate** on Friday.

The **journalist** from the **Herald** questioned the book's publisher.

The **price** was raised by the **company** after the end of year sales.

The group of **actors** negotiated with the **agent** of the theatre.

The **fear** of death inspired the courageous **firemen** who fought the blaze.

The rising **expense** of boxes worried the **employer** in the financial crisis.

The **medicine** was donated to help the **sick** in Africa.

The **bear** was spotted fishing in the **stream** by the visitors.

The **swim** was cancelled after the **lightning** struck the building.

The **carpenters** had to wear **vests** in the construction zone.

The **supplies** were packed for the **hike** in the mountains.

The **antiques** were found during the **dig** in Greece.

The **shelter** was built to protect the **vehicles** from being destroyed.

The **potatoes** were planted in the **spring** to harvest next year.

The **campaign** was conducted to attract new **recruits** to the base.

The **meal** was roasted for the **lunch** hours ahead of serving.

The **hats** were donated to **charity** for the children.

### *Filler sentences*

The officer was keen to accept his new post overseas.

The ambassador's wife wanted to order a new dresser.

The old folks' club had gone on its regular Friday outing.

The detour was constructed to avoid the burst water main.

The old Volvo broke down while they were on holiday in Kent.

The geology student decided to buy the second-hand scooter.

The ducklings in the lake were quarrelling for the scraps.

The National Reserve Kiosk was reopened after refurbishment.

The bridge nearest the town was repaired by the local council.

The brain surgeon successfully removed even the smallest of the tumours.

The leader of the expedition refused to turn back to the nearest dock.

The estates of the village were maintained by a former landscaper.

The checking of the ballots was improved after the new software was installed.

The gems in the museum turned out to be forgeries.

The university vice-chancellor's opinion was given on the evening news.

The Member of Parliament was angry about the investigator's allegation.

The entire cohort attended the delicious backyard barbeque.

The association of consumers approved the new delivery procedure.

The voice of the caller was hard to hear on the defective telephone.

The route to the Cape was washed out in the tropical downpour.

The personnel overseer of the department hired additional sales representatives.

The rich playboy spent most of his time on his luxury yacht.

The graffiti in the underground greatly amused the Japanese sightseer.

The president of the United States encouraged peace between the conflicting nations.

The reporter from the daily paper was responsible for the candid article.

The suspension of the student was protested at the school assembly.

The accountant of the dairy will check on his account.

The homeowners of the district were annoyed at the building codes.

The value of the bonds was altered with the devalued currency.

The member of the cabinet was involved in the peace protests.

The lady with the bag went into the nursery.

The flavour of the coffee was ruined by the dirty water.

The owner of the bakery gladly went to the councillor's party.

The chauffeur of the businessman was reluctant to drive the limousine through the detour.

The programme about the Brontes interested the common viewers.

The highlight of the holiday was snorkelling amongst colourful fish.

The attitude of the CEO excited the board members.

The group of sightseers from Denmark photographed the crocodile wrestler.

The fossils of the dinosaur were found by the Cuban scientist.

The villa with the carport must belong to the doctor's son.

Table S1. Mean reaction times (SE in brackets) for correct and incorrect responses in Experiment 1a and 1b.

| Target Type | Incorrect | Correct | Total  |
|-------------|-----------|---------|--------|
|             | 1225.63   | 829.73  | 930.95 |
| Korean exp  | (21.91)   | (8.12)  | (8.64) |
|             | 1203.95   | 892.47  | 977.02 |
| English exp | (18.05)   | (7.95)  | (7.86) |

Table S2. Mean reaction times (SE in brackets) for correct and incorrect target responses in Experiment 2a. (English)

| Target Type  | Incorrect | Correct         | Total          |
|--------------|-----------|-----------------|----------------|
|              | 1073.11   |                 |                |
| Identical    | (22.43)   | 900.81 (10.83)  | 945.92 (10.04) |
|              | 1063.57   |                 |                |
| Phonological | (28.72)   | 973.45 (11.42)  | 991.1 (10.80)  |
|              | 1065.76   |                 | 1026.81        |
| Semantic     | (27.71)   | 1015.99 (13.09) | (11.89)        |
|              | 1067.95   |                 |                |
| Total        | (14.99)   | 964.77 (6.87)   | 987.97 (6.33)  |

Table S3. Mean reaction times (SE in brackets) for correct and incorrect target responses in Experiment 2b. (English)

| Target Type  | Incorrect      | Correct         | Total          |
|--------------|----------------|-----------------|----------------|
|              | 1186.05        |                 |                |
| Identical    | (31.81)        | 915.83 (15.39)  | 998.9 (14.76)  |
|              | 1155.57        |                 |                |
| Phonological | (50.19)        | 950.2 (12.61)   | 979.52 (13.08) |
|              | 1085.26        |                 | 1031.45        |
| Semantic     | (34.45)        | 1014.37 (14.84) | (14.00)        |
| Total        | 1145.4 (21.28) | 960.41 (8.22)   | 1003.23 (8.08) |

#### 4. Pairwise contrasts for *phonological* and *semantic* target types, Ex 2.

##### Experiment 2a (Korean)

| phonological |          |       |         |         |
|--------------|----------|-------|---------|---------|
| contrast     | estimate | SE    | z ratio | p value |
| N - PR       | -0.211   | 0.288 | -0.734  | 0.883   |
| N - PS       | 0.396    | 0.276 | 1.431   | 0.480   |
| N - ST       | 0.379    | 0.287 | 1.319   | 0.551   |
| PR - PS      | 0.607    | 0.281 | 2.158   | 0.135   |
| PR - ST      | 0.590    | 0.285 | 2.073   | 0.162   |
| PS - ST      | -0.017   | 0.237 | -0.071  | 1.000   |

| semantic |          |       |         |         |
|----------|----------|-------|---------|---------|
| contrast | estimate | SE    | z ratio | p value |
| N - PR   | -0.152   | 0.234 | -0.649  | 0.916   |
| N - PS   | -0.315   | 0.244 | -1.288  | 0.571   |
| N - ST   | -0.275   | 0.253 | -1.086  | 0.698   |
| PR - PS  | -0.163   | 0.241 | -0.675  | 0.906   |
| PR - ST  | -0.123   | 0.241 | -0.510  | 0.957   |
| PS - ST  | 0.040    | 0.215 | 0.185   | 0.998   |

##### Experiment 2b (English)

| phonological |          |       |         |         |
|--------------|----------|-------|---------|---------|
| contrast     | estimate | SE    | z ratio | p value |
| N - PR       | 0.109    | 0.198 | 0.548   | 0.947   |
| N - PS       | -0.323   | 0.250 | -1.289  | 0.570   |
| N - ST       | -0.127   | 0.220 | -0.579  | 0.939   |
| PR - PS      | -0.431   | 0.258 | -1.673  | 0.338   |
| PR - ST      | -0.236   | 0.246 | -0.961  | 0.772   |
| PS - ST      | 0.195    | 0.221 | 0.883   | 0.814   |

| semantic |          |       |         |         |
|----------|----------|-------|---------|---------|
| contrast | estimate | SE    | z ratio | p value |
| N - PR   | -0.075   | 0.198 | -0.380  | 0.981   |
| N - PS   | 0.116    | 0.237 | 0.489   | 0.962   |
| N - ST   | -0.171   | 0.218 | -0.785  | 0.861   |
| PR - PS  | 0.191    | 0.249 | 0.769   | 0.869   |
| PR - ST  | -0.096   | 0.248 | -0.387  | 0.980   |
| PS - ST  | -0.287   | 0.210 | -1.367  | 0.520   |

5.

**Table S4a**

| Exp 2a   |           |        |          |         |
|----------|-----------|--------|----------|---------|
| quartile | condition | target | accuracy | RT      |
| 1        | N         | ident  | 0.75     | 946.65  |
| 1        | N         | phono  | 0.88     | 1129.51 |
| 1        | N         | seman  | 0.63     | 1100.59 |
| 1        | PR        | ident  | 0.74     | 1178.00 |
| 1        | PR        | phono  | 0.86     | 1071.53 |
| 1        | PR        | seman  | 0.62     | 1127.28 |
| 1        | PS        | ident  | 0.90     | 876.85  |
| 1        | PS        | phono  | 0.80     | 1075.34 |
| 1        | PS        | seman  | 0.81     | 1158.93 |
| 1        | ST        | ident  | 0.81     | 975.86  |
| 1        | ST        | phono  | 0.87     | 1079.34 |
| 1        | ST        | seman  | 0.81     | 1081.90 |
| 2        | N         | ident  | 0.65     | 1149.53 |
| 2        | N         | phono  | 0.86     | 982.73  |
| 2        | N         | seman  | 0.75     | 1078.91 |
| 2        | PR        | ident  | 0.71     | 1010.75 |
| 2        | PR        | phono  | 0.89     | 915.09  |
| 2        | PR        | seman  | 0.78     | 1064.52 |
| 2        | PS        | ident  | 0.77     | 1037.01 |
| 2        | PS        | phono  | 0.83     | 1031.50 |
| 2        | PS        | seman  | 0.77     | 1073.23 |
| 2        | ST        | ident  | 0.73     | 1016.34 |
| 2        | ST        | phono  | 0.80     | 1024.35 |
| 2        | ST        | seman  | 0.80     | 1055.19 |
| 3        | N         | ident  | 0.61     | 1032.31 |
| 3        | N         | phono  | 0.87     | 975.23  |
| 3        | N         | seman  | 0.85     | 973.11  |
| 3        | PR        | ident  | 0.76     | 1017.77 |
| 3        | PR        | phono  | 0.91     | 851.09  |
| 3        | PR        | seman  | 0.83     | 951.75  |
| 3        | PS        | ident  | 0.79     | 992.75  |
| 3        | PS        | phono  | 0.87     | 1002.32 |
| 3        | PS        | seman  | 0.77     | 1036.39 |
| 3        | ST        | ident  | 0.70     | 1073.27 |
| 3        | ST        | phono  | 0.84     | 952.26  |
| 3        | ST        | seman  | 0.69     | 1040.96 |
| 4        | N         | ident  | 0.52     | 1058.46 |

|   |    |       |      |         |
|---|----|-------|------|---------|
| 4 | N  | phono | 0.88 | 946.94  |
| 4 | N  | seman | 0.74 | 977.96  |
| 4 | PR | ident | 0.65 | 962.74  |
| 4 | PR | phono | 0.88 | 916.50  |
| 4 | PR | seman | 0.80 | 884.20  |
| 4 | PS | ident | 0.58 | 936.91  |
| 4 | PS | phono | 0.89 | 870.01  |
| 4 | PS | seman | 0.80 | 952.36  |
| 4 | ST | ident | 0.62 | 930.91  |
| 4 | ST | phono | 0.87 | 851.96  |
| 4 | ST | seman | 0.85 | 1020.99 |

| Exp 2b   |           |        |          |         |
|----------|-----------|--------|----------|---------|
| quartile | condition | target | accuracy | RT      |
| 1        | N         | ident  | 0.71     | 1014.10 |
| 1        | N         | phono  | 0.81     | 1264.65 |
| 1        | N         | seman  | 0.76     | 1213.82 |
| 1        | PR        | ident  | 0.88     | 831.13  |
| 1        | PR        | phono  | 0.75     | 981.79  |
| 1        | PR        | seman  | 0.74     | 1164.60 |
| 1        | PS        | ident  | 0.82     | 880.39  |
| 1        | PS        | phono  | 0.77     | 996.90  |
| 1        | PS        | seman  | 0.65     | 1017.80 |
| 1        | ST        | ident  | 0.69     | 1028.48 |
| 1        | ST        | phono  | 0.75     | 1172.49 |
| 1        | ST        | seman  | 0.75     | 1230.95 |
| 2        | N         | ident  | 0.76     | 954.99  |
| 2        | N         | phono  | 0.82     | 914.86  |
| 2        | N         | seman  | 0.80     | 958.39  |
| 2        | PR        | ident  | 0.74     | 999.54  |
| 2        | PR        | phono  | 0.87     | 1010.61 |
| 2        | PR        | seman  | 0.91     | 918.69  |
| 2        | PS        | ident  | 0.88     | 828.03  |
| 2        | PS        | phono  | 0.82     | 993.01  |
| 2        | PS        | seman  | 0.82     | 1026.45 |
| 2        | ST        | ident  | 0.77     | 898.16  |
| 2        | ST        | phono  | 0.77     | 1049.94 |
| 2        | ST        | seman  | 0.88     | 1042.81 |
| 3        | N         | ident  | 0.70     | 1046.41 |
| 3        | N         | phono  | 0.72     | 1019.28 |
| 3        | N         | seman  | 0.83     | 944.31  |



|   |    |       |      |         |
|---|----|-------|------|---------|
| 3 | PR | ident | 0.72 | 994.80  |
| 3 | PR | phono | 0.77 | 971.75  |
| 3 | PR | seman | 0.79 | 1003.71 |
| 3 | PS | ident | 0.78 | 956.83  |
| 3 | PS | phono | 0.86 | 1017.33 |
| 3 | PS | seman | 0.85 | 1013.17 |
| 3 | ST | ident | 0.67 | 925.38  |
| 3 | ST | phono | 0.82 | 1061.05 |
| 3 | ST | seman | 0.75 | 882.98  |
| 4 | N  | ident | 0.59 | 972.35  |
| 4 | N  | phono | 0.83 | 930.91  |
| 4 | N  | seman | 0.76 | 909.28  |
| 4 | PR | ident | 0.67 | 896.34  |
| 4 | PR | phono | 0.77 | 863.38  |
| 4 | PR | seman | 0.73 | 982.30  |
| 4 | PS | ident | 0.73 | 1003.05 |
| 4 | PS | phono | 0.89 | 895.18  |
| 4 | PS | seman | 0.72 | 931.13  |
| 4 | ST | ident | 0.66 | 967.02  |
| 4 | ST | phono | 0.86 | 933.83  |
| 4 | ST | seman | 0.84 | 1067.91 |

---

6.

**Table S4b**

| Exp 1a   |           |          |         |
|----------|-----------|----------|---------|
| quartile | condition | accuracy | RT      |
| 1        | N         | 0.70     | 1093.42 |
| 1        | PR        | 0.82     | 871.49  |
| 1        | PS        | 0.86     | 932.03  |
| 1        | ST        | 0.82     | 866.47  |
| 2        | N         | 0.61     | 1022.72 |
| 2        | PR        | 0.68     | 964.81  |
| 2        | PS        | 0.82     | 890.43  |
| 2        | ST        | 0.78     | 912.61  |
| 3        | N         | 0.67     | 957.41  |
| 3        | PR        | 0.69     | 1009.15 |
| 3        | PS        | 0.85     | 801.38  |
| 3        | ST        | 0.75     | 909.32  |
| 4        | N         | 0.66     | 1009.89 |
| 4        | PR        | 0.73     | 970.13  |
| 4        | PS        | 0.77     | 849.26  |
| 4        | ST        | 0.75     | 897.16  |
| Exp 1b   |           |          |         |
| quartile | condition | accuracy | RT      |
| 1        | N         | 0.72     | 1008.92 |
| 1        | PR        | 0.77     | 1046.62 |
| 1        | PS        | 0.85     | 901.06  |
| 1        | ST        | 0.74     | 1082.43 |
| 2        | N         | 0.65     | 1049.02 |
| 2        | PR        | 0.72     | 981.81  |
| 2        | PS        | 0.82     | 928.67  |
| 2        | ST        | 0.65     | 960.00  |
| 3        | N         | 0.64     | 1030.67 |
| 3        | PR        | 0.80     | 948.63  |
| 3        | PS        | 0.82     | 899.23  |
| 3        | ST        | 0.71     | 933.41  |
| 4        | N         | 0.64     | 1068.30 |
| 4        | PR        | 0.74     | 961.92  |
| 4        | PS        | 0.73     | 931.24  |
| 4        | ST        | 0.73     | 965.92  |
